1 **Title:** General characterization of regeneration in *Aeolosoma viride*

2 **Authors:** Chiao-Ping Chen<sup>1†</sup>, Sheridan Ke-Wing Fok<sup>1†</sup>, Yu-Wen Hsieh<sup>2</sup>, Cheng-Yi

3 Chen<sup>3</sup>, Fei-Man Hsu<sup>4</sup> and Jiun-Hong Chen<sup>1\*</sup>

4 **Affiliations:**

5 <sup>1</sup>Department of Life Science, National Taiwan University, Taipei, Taiwan

6 <sup>2</sup> Max Planck Institute of Molecular Cell Biology and Genetics, Dresden, Germany

7 <sup>3</sup> Stowers Institute for Medical Research, Missouri, America

8 <sup>4</sup> Graduate School of Frontier Sciences, The University of Tokyo, Chiba, Japan

9

10 \*Corresponding author:

11 Development of Life Science

12 National Taiwan University

13 Taipei, 106

14 Telephone: +886 (2) 33662502

15 E-mail: chenjh@ntu.edu.tw

16 † Chiao-Ping Chen and Sheridan Ke-Wing Fok are co-first authors of this paper.

17

18 **Abstract**

19 Regeneration has long attracted scientists for its potential to restore lost, damaged or

20 aged tissues and organs. A wide range of studies have conducted on different model

21 organisms on both cellular and molecular levels. Current evidences suggest that a

22 variety of regenerative strategies are developed and used by different species, and

23 their regenerative strategies are highly correlated to their reproductive methods. Our

24 present work focused on the freshwater annelid *Aeolosoma viride*, which reproduces  
25 by paratonic fission and is capable of complete regeneration. We found out that *A.*  
26 *viride* can regenerate both anterior and posterior end, even with only 3 segments  
27 remained. This process is characterized by epimorphosis that involves large amount of  
28 cell proliferation which drives the formation of blastema. Cell proliferation and  
29 regeneration successful ratio were significantly decreased when treated with  
30 microtubule inhibitor taxol or *Avi-tubulin* dsRNA, which confirmed that cell  
31 proliferation served as a key event during regeneration. Together, our data described  
32 the regenerative processes of *A. viride*, which includes high level of cell proliferation  
33 and the formation of blastema. Furthermore, our findings demonstrated *A. viride* as a  
34 potential model for the study of regeneration.

35

36 **Keywords:** *Aeolosoma viride*, Epimorphic regeneration, Cell proliferation, Blastema

37

## 38 **Introduction**

39 An ability to regenerate lost body part is widely, but non-uniformly, distributed in the  
40 animal kingdom [1-3]. Both the capacities and mechanisms of regeneration differ  
41 between taxa. T. H. Morgan described the processes of regeneration in two  
42 generalized terms, namely morphallaxis and epimorphosis [4]. Morphallaxis is

43 characterized by rearrangement of pre-existing cells and the absence of blastema [5].  
44 Early regeneration in hydra is a classic example of morphallaxis as it requires  
45 minimum cell proliferation and redistribution of pre-existing tissues. In epimorphosis,  
46 on the other hand, undifferentiated cells or progenitor cells aggregate at the wound  
47 sites, and these undifferentiated cells proliferate to form a blastema [6, 7]. Therefore,  
48 cell proliferation is required for epimorphic regeneration, and application of drugs that  
49 perturb cell cycle progression, such as nocodazole or hydroxyurea, would prevent  
50 normal progression of regeneration [8].

51

52 Asexual reproduction is often compared to regeneration, since identical individuals  
53 arise from fragments of somatic tissue in both processes [9]. Asexual reproduction in  
54 annelids can be divided into two major types: architomy and paratomy. Architomy is  
55 fission followed by fragmentation. Contrarily, paratomy required individuals to be  
56 fully formed or developed prior to fission [10]. In paratomic reproduction,  
57 reconstitution or rearrangement of somatic tissue typically occurs in a predictable  
58 growth zone. Previous studies demonstrated that such a growth zones can also  
59 regenerate lost body parts after injury in certain species reproduce by paratomic  
60 fission [9, 11].

61

62 Paratomic fission has been described as a common character of annelids, as it is found  
63 in taxonomic groups such as Sipuncula, Serpulidae, Aeolosomatidae, and Naididae  
64 [12]. Regeneration is also wide-spreading among annelids [13, 14]. Nevertheless,  
65 species differs in their regenerative capacities. For example, the naidid *Pristina leidy*  
66 mostly reproduce by paratomic fission and is able to complete both anterior and  
67 posterior regeneration [11]. In contrast, the capitellid polychaete *Capitella teleta*  
68 mostly reproduce sexually and is only capable to partially regenerate its posterior end  
69 [15]. Such a difference may reflect a connection between asexual reproduction by  
70 paratomic fission and regeneration [9, 12, 16].

71

72 Aeolosomatidae are polychetae that mostly inhabit in fresh water environment [17].  
73 Approximately 30 species have been identified in this family, and predominantly  
74 reproduce by agametic reproduction [10, 18]. Most aeolosomatid species reproduce  
75 by paratomic fission to create clonal individuals, and an ability to regenerate the  
76 anterior and posterior segments after injury has been demonstrated in some species of  
77 this family [19]. However, there is no detailed descriptive characterization of the  
78 regeneration in this group of annelids. In this study, we provided a detailed  
79 description of the regeneration process in *Aeolosoma viride*. It was observed that this  
80 worm can restore its lost body parts, both anteriorly and posteriorly, within 3-5 days.

81 Furthermore, we demonstrated that a high level of cell proliferation occurs at the  
82 wound site and that such a cell proliferation activity is critical for the completion of  
83 regeneration. Using pulse-and-chase experiments, we were able to show that cell  
84 migration has no particular role in anterior regeneration of *A. viride*. Finally, our study  
85 demonstrated the potential of *A. viride* to be an excellent model for regenerative  
86 studies.

87

## 88 **Results**

### 89 **General and reproductive characteristics of *A. viride***

90 *Aeolosoma viride* is a 2-3 mm length semi-transparent annelid contained 10 to 12  
91 segments with pairs of chaetae at each side of the worms. The intact worm has a  
92 ring-like mouth structure that can be observed at both dorsal and ventral side of the  
93 peristomium (1<sup>st</sup> segment). Mouth is connected to an enlarged digestive tract located  
94 at the center of the worm, which can be easily observed under a dissecting microscope.  
95 *A. viride* exclusively perform paratonic fission to asexually reproduce one progeny  
96 from its posterior end (Fig. 1). The paratonic fission started by extension of the  
97 posterior end. Worms exceeding 12 segments with an unusual lengthy posterior region  
98 could be easily observed (Fig. 1C). The anterior portion of the offspring gradually  
99 developed and formed a head shape tilted apart from the parental worm (Fig. 1D). At

100 this stage, the parent and the progeny can be easily distinguished. Finally, the  
101 offspring worm separates apart from the parental worm, and becomes an individual  
102 worm (Fig. 1E).

103

#### 104 **Anterior regeneration in *A. viride***

105 Anterior amputation is performed in front of the enlarged digestive tract. Immediately  
106 after amputation, the worm severely twisted; fluids and food residues gushed from the  
107 inner cavity. At 3 hours post amputation (hpa), the regenerating *A. viride* adhered on  
108 the bottom of culture chamber, and its wounded area remained rough and uneven. The  
109 rough wounded area became smoothed within 6 hpa. At 12 hpa, a small amount of  
110 tissue became lighter and clearer in color, started to develop at the regenerating area.  
111 This tissue will later be proven to be the regenerative blastema. The protruding  
112 regenerative blastema expanded from the center of the wounded area and became  
113 apparent from 24 to 48 hpa. Vertical contraction could be observed from 72 hpa, but  
114 the regenerating worms were still unable to move freely. The reappearance of  
115 ring-like structure characterized mouth formation, and a tubular structure (esophagus)  
116 extended to connect with the enlarged digestive tract at 96 hpa. After 96 hours of  
117 regeneration, the regenerating head area gradually bulged and became wider than  
118 other body segments. The prostomium expanded from 96 to 120 hpa (Fig. 2B).

119 During the entire process of regeneration, the regenerating *A. viride* remain adhere on  
120 the bottom of culture chamber. Most of them could swim freely around 120 hpa,  
121 which was considered as an indicator for successful regeneration in *A. viride*.

122

### 123 **The regenerative capacity of *A. viride***

124 For characterization of the regenerative capacity, either the anterior or the posterior  
125 ends of worms were amputated. Amputated worms with three segments could still  
126 complete regeneration, even the successful ratio was around 40%. Over 60% of  
127 worms with 6 or 9 posterior segments completed their anterior regeneration at 5 day  
128 post amputation (dpa) (Fig. 3). Posterior regeneration shared a similar pattern. Over  
129 53.3% worms with three anterior segments completed their posterior regeneration.  
130 Worms with 6 or 9 anterior segments increased successful ratio of posterior  
131 regeneration over 80% at 3 dpa (Fig. 3). Since the anterior segments of *A. viride*  
132 contain the mouth and the brain, their complexity and importance outweigh the  
133 posterior segments. Therefore, all following experiments in this study were conducted  
134 on the anterior end.

135

### 136 **Cell proliferation in the regenerative process of *A. viride***

137 EdU signal showed proliferating cells continuously present in *A. viride*. The worms

138 were also stained with a nuclear dye Hoechst 33342 to conform the EdU labeling (Fig.  
139 4A). Intact and regenerating worms were incubated in EdU solution 12 hours prior to  
140 fixation. Normally, the EdU<sup>+</sup> cells were significantly detected at the posterior end of  
141 intact worm, the area of asexual reproductive zone, which is the connecting interface  
142 between the parent and the future offspring. The EdU signal was also detected at the  
143 anterior mouth with minor EdU signals randomly distributed in intact and  
144 regenerating worms from 0 to 12 hpa. However, signals posterior to the amputation  
145 site quickly diminished after 24 hpa. During regeneration, the EdU signal became  
146 concentrated at the regenerating blastema, and the strongest signal was observed at 24  
147 and 48 hpa, then gently decreased from 72 to 120 hpa. At 96 and 120 hpa, EdU<sup>+</sup> cell  
148 formed a ring-like shape at the center of head, which indicated the development of  
149 mouth in the regenerating worms (Fig. 4C).

150

### 151 **Cell proliferation is required for anterior regeneration**

152 *Aeolosoma viride* were treated with taxol, an inhibitor of cell proliferation that works  
153 by interfering with the normal function of microtubules. As previous result has shown,  
154 the largest amount of proliferating cells was detected at 48 hpa (Fig. 4C). However,  
155 the EdU signal in the blastema were apparently reduced by 25  $\mu$ M of taxol at 48 hpa,  
156 which indicated that the proliferating blastema was not properly formed at anterior



157 regenerating site (Fig. 5A). The regeneration successful ratio of *A. viride* treated with  
158 25  $\mu$ M taxol decreased 80% at 5 dpa and 45% at 7 dpa (Fig. 5B). Also, the bulged  
159 head of the regenerating *A. viride* was absent after taxol treatment, and only a tiny  
160 blastema was observed at 5 and 7 dpa (Fig. 5C).

161

162 To confirm the importance of cell proliferation on regeneration in *A. viride*, we also  
163 used gene-specific dsRNA to perform RNA interference. Both feeding and  
164 microinjecting dsRNA successfully reduced the expression of *Avi-tubulin* mRNA by  
165 50% compared to *yfp* dsRNA (MOCK) (Fig. 6A). Western blot was conducted to  
166 further confirm this result. The predicted molecular weight of tubulin protein is 48.8  
167 kDa. *Avi-actin* served as loading control, and its predicted molecular weight is 42.1  
168 kDa. The result showed a significant reduction of tubulin protein expression  
169 comparing to MOCK RNAi (Fig. 6B). In addition, worms treated with *yfp* dsRNA  
170 regenerated normally. But, the regeneration of *Avi-tubulin* RNAi treated animals was  
171 significantly inhibited at 5 dpa. The group of feeding dsRNA reduced successful ratio  
172 of regeneration by 45%, whereas the group of injecting dsRNA reduced by 35% (Fig.  
173 6C).

174

175 **Cell migration in the regeneration of *A. viride***

176 Some speculated that the source of stem or progenitor cells in the regenerative area  
177 could be migration [20]. Stem cell migration not only is fundamental to embryonic  
178 development, but also indispensable to adult tissue homeostasis and repair [21].

179

180 To examine the role and importance of cell migration during anterior regeneration of  
181 *A. viride*, pulse-chase experiment with EdU labeling was performed. Only a few EdU<sup>+</sup>  
182 cells were detected at the surface of the newly regenerated tissue at 24, 72 and 120  
183 hpa (Fig. 7). However, the distribution of EdU<sup>+</sup> cells around non-regenerated area was  
184 evident from 24 to 120 hpa.

185

## 186 **Discussion**

187 *Aeolosoma viride* is the first species in Aeolosomatidae used as a model for detailed  
188 regeneration study. In this study, we had carefully evaluated the regenerative capacity  
189 of *A. viride*. Regeneration of *A. viride* followed by either anterior and posterior  
190 amputation could be completely restored within 5 days and 3 days respectively. Most  
191 worms could survive and regenerate with 3 segments. Anterior regeneration showed  
192 lower successful ratio than posterior regeneration. It is reasonable to explain that the  
193 anterior regeneration is involved the restoration of a more complex structure including  
194 head and mouth. Even so, compared with earthworm *Enchytraeus japonensis* that

195 could regenerate into complete individual from 6 fragments [22], and *Eisenia fetida*  
196 that could only partially regenerate [23], *A. viride* clearly demonstrated a stronger  
197 regenerative ability.

198

199 Sexual and asexual reproduction including budding, paratonic fission, and  
200 fragmentation have all been documented in annelid reproduction [24]. Previous study  
201 has recorded the regenerative capacity and reproductive strategies of many annelids,  
202 and discovered that most annelids capable of head regeneration reproduce by asexual  
203 reproduction [25]. *Aeolosoma viride* had been recorded that its reproduction is  
204 exclusively asexual by paratonic fission [18]. Our study provided detailed imaging on  
205 the entire process, and confirmed the idea that animals with asexual reproductive  
206 characters typically demonstrated strong regenerative capacity.

207

208 Cell proliferation is generally considered to be the key event that occurs at the area of  
209 regeneration [26, 27]. The contribution of cell proliferation to regeneration differs  
210 across metazoan models [8]. In this study, large amount of EdU<sup>+</sup> cells present at  
211 blastema during regeneration. Combined with the changes in morphology, we  
212 observed that anterior amputation in *A. viride* is followed by the formation of  
213 blastema with great quantity of cell proliferation during regeneration. Also, significant

214 decrease of proliferating cells was observed at the blastema after treated with mitotic  
215 inhibitor taxol. Together, these data demonstrated the importance of cell proliferation  
216 in the regenerative process of *A. viride*.

217

218 Although variation exists in regeneration ability and mechanism, the widespread  
219 phylogenetic distribution of blastema formation in annelid suggested an evolutionary  
220 ancient origin of regeneration process. Even though, recent studies indicated that  
221 regeneration could not be solely classified as epimorphic or morphallatic, several  
222 segmented worm species including *Branchiomma luctuosum* and *C. teleta* have  
223 shown limited evidence for morphallaxis [28, 29]. Morphallaxis is characterized by  
224 rearrangement of pre-existing tissues, which strongly depend on stem cells or  
225 remaining undifferentiated cells migrating to the injured site [30]. Our data supported  
226 the hypothesis that *A. viride* carried out anterior regeneration by epimorphosis which  
227 is consistent with most other annelids [29, 31-34]. Recent findings inferred that  
228 regeneration in annelids involves both cell proliferation and cell migration [35]. And  
229 the cellular source of blastema originated from the migration of stem cells [20].  
230 According to our pulse-chase experiment, EdU<sup>+</sup> cells were limited in the anterior  
231 regenerating site, which means that only a small amount of proliferating cells  
232 migrated into the wounded area during anterior regeneration. This allowed us to

233 hypothesize that cell migration served no specific or limited role during anterior  
234 regeneration in *A. viride*. There was no evident morphallaxis occurred, however,  
235 further experiment with stem cell markers and live-imaging are needed for a definite  
236 conclusion.

237

238 Limited regeneration studies conducted on annelids model organisms. Hydra and  
239 planarian are both considered as the master of regeneration, and often used as the  
240 model organisms for regeneration studies [7, 36-39]. But, there are specific  
241 restrictions on regeneration studies regarding these commonly used animals. Both  
242 planarian and hydra lack sophisticated organ systems and a complex central nervous  
243 system, which is far different from vertebrate animals. Hydra regeneration is also  
244 classified as morphallactic, which means that they could regenerate under limited cell  
245 proliferation [40, 41]. And based on current studies, none of the known vertebrate  
246 could regenerate mainly through morphallaxis. Epimorphosis is the major type of  
247 regeneration observed in vertebrate animals. Salamander, *Xenopus* and zebrafish are  
248 all prominent examples of animal models used in the study of epimorphic  
249 regeneration. However, regeneration in these animals is limited to specific organs or  
250 tissues. Some might even have restriction on early stage of life [42-44]. Certain  
251 species of echinoderms could completely regenerate from a piece of tissues [45], but

252 echinoderm shared very different characteristic from vertebrate animals, such as body  
253 symmetry, lack of head, digestive, and circulatory system. Due to the limitations that  
254 current models retained, we believe that annelids can serve as different model  
255 organism for the study of regeneration. Besides an evolutionary advantage, *A. viride*  
256 also possess similar level of experimental advantages compare to many current model  
257 organisms. Small molecular inhibitors, molecular tools were both applicable on this  
258 worm. First, *A. viride* is easy to maintain and raise in laboratory. Second, *A. viride* has  
259 small and transparent body which make them easy to be manipulated and observed  
260 during the experimental processes. Last but not least, RNA interference was used in  
261 the study of molecular biology to knock down or silence specific mRNA expression.  
262 Feeding method commonly designed for *C. elegans* and microinjecting method  
263 designed for animal embryo and adult were both functional in this newly introduced  
264 model animal [46]. In addition to its regeneration capacity, this small annelid has  
265 relative short lifespan and reproductive cycle which is suited for study on aging  
266 [47-49].

267

268 In conclusion, we examined the regenerative capacity in *A. viride*, especially on  
269 anterior regeneration. In addition to strong regeneration ability, *A. viride* has several  
270 characters that may make them valuable as a potential animal model for regeneration

271 research.

272

## 273 **Materials and Methods**

### 274 **Animals**

275 *Aeolosoma viride* was cultured in artificial spring water (ASW, 48 mg L<sup>-1</sup> NaHCO<sub>3</sub>,  
276 24 mg L<sup>-1</sup> CaSO<sub>4</sub>•2H<sub>2</sub>O, 30 mg L<sup>-1</sup> MgSO<sub>4</sub>•7H<sub>2</sub>O, and 2 mg L<sup>-1</sup> KCl in distilled water,  
277 pH = 7.4) at 25°C under 12 hours of day-night cycles. Grounded oat meal serves as  
278 major food source. Approximately 500 ± 200 worms were fed with 20 mg powdered  
279 oats 3 to 5 times per week. Prior to all experiment, worms were starved in ASW  
280 overnight.

281

### 282 **Regeneration experiment**

283 *Aeolosoma viride* without offspring was selected for the following experiment. To  
284 analyze the capacity of regeneration, amputation was carried out at the desired  
285 segment in *A. viride* (Fig. 1A). The detail morphological changes of regenerating  
286 worms were observed with an Olympus DP80 microscope for the following 3 to 168  
287 hours. The successful ratio of anterior or posterior regeneration was determined from  
288 morphology and behavior with a dissecting microscope (WILD M8, Leica) at 1 to 7  
289 days post-amputation (dpa).

290

291 In the inhibitory experiment, all procedures were similar as described earlier, but the  
292 animal were transferred into fresh ASW containing 25  $\mu$ M taxol (Sigma-Aldrich)

293

#### 294 **EdU labeling**

295 Worms were treated with EdU (100  $\mu$ g ml<sup>-1</sup>) for 12 or 24 hours prior to amputation;  
296 12 to 120 hours prior to fixation. The animals were fixed with 4% paraformaldehyde  
297 (PFA) at 4°C overnight. Whole-mount immunohistochemistry detection was processed  
298 using the Click-iT EdU Alexa Fluor 488 Imaging Kit (Invitrogen) according to the  
299 manufacturer's protocol.

300

#### 301 **RNA interference (RNAi)**

302 *Avi-tubulin* was cloned by our lab (NCBI # AQP09899.1). The RNA interference  
303 protocol was modified as described previously [50]. Partial sequence of yellow  
304 fluorescent protein (*yfp*, as MOCK group) or *Avi-tubulin* were constructed with L4440  
305 vector and transformed into an RNase III deficient strain competent cell HT115 (DE3)  
306 (Yeastern Biotech). *A. viride* was fed with bacteria containing dsRNA for 3 days.

307

308 Microinjecting method was modified based on previous study [51]. The *yfp* or



309 *Avi-tubulin* dsRNA were *in vitro* transcribed with T7 polymerase (Ambion). Each  
310 individual animal was injected 50 ng of dsRNA through microinjector (Promega) for  
311 3 consecutive days. Worms were then collected for RNA extraction, protein extraction  
312 or regeneration study afterward.

313

#### 314 **RNA exaction and quantitative real-time RT-PCR (qRT-PCR)**

315 The total RNAs were extracted from 20 worms by using TRIzol and  
316 then reverse-transcribed to cDNA by using SuperScript III Kit (Invitrogen).

317 Transcriptional levels were determined by Bio-Rad iCycler™ (Bio-Rad) using SYBR  
318 green system. The primers used to amplify *Avi-tubulin* were 5'-

319 GGTAACAACCTGGGCTAAGGG-3' and 5'-GCGAAGCCAGGCATGAAGAA-3'.

320 *Avi-actin* was used as internal control with specific primers:

321 5'-ATGGAGAAGATCTGGCATCA-3' and 5'-GGAGTACTTGCGCTCAGGTG-3'

322 designed from *Avi-tublin* (NCBI # AQP09898.1). Relative quantification of gene

323 expression was calculated by using the  $\Delta\Delta C_t$  method. Three technical replicates were

324 used in each real-time PCR reaction, and a no-template blank was served as negative

325 control.

326

#### 327 **Western blotting**

328 Animals were homogenized in RIPA buffer (50 mM Tris-HCl (pH 7.0), 150 mM NaCl,  
329 1% Triton X-100, 0.5% C<sub>24</sub>H<sub>40</sub>O<sub>4</sub>, 0.1% SDS with protease inhibitor cocktail  
330 (Sigma-Aldrich) and DNase (Promega)). The homogenized samples were mixed with  
331 sample buffer (60 mM Tris-HCl (pH 6.8), 25% glycerol, 2% SDS, 14.4 mM  
332 2-mercaptoethanol and 0.1% bromophenol blue), separated by 7.5% polyacrylamide  
333 gel, and transferred to a PVDF membrane (Millipore). After blocking with 5% BSA at  
334 25°C for 1 h, the PVDF membrane was incubated with either anti-acetylated  $\alpha$ -tubulin  
335 (1:8000, GeneTex) or anti- $\alpha$ -actin (1:8000, Santa Cruz) antibodies in the blocking  
336 solution at 25°C for 1 h, rinsed three times with PBST, and then incubated with either  
337 HRP-conjugated goat anti-mouse IgG (1:3000, Chemicon-Millipore) for  $\alpha$ -tubulin or  
338 HRP-conjugated goat anti-rabbit IgG (1:8000, Chemicon-Millipore) for  $\alpha$ -actin.  
339 Finally, patterns were detected on the PVDF membrane by ECL (Biomax).

340

#### 341 **Statistics**

342 Data were tested for significance using one-way analysis of variance with a Scheffe's  
343 method post *hoc* test or two-tailed unpaired student's t-test. Probability values of  $p <$   
344 0.05 were regarded as statistically significant.

345

#### 346 **References**

- 347 1. Umesono Y, Tasaki J, Nishimura K, Inoue T, Agata K. Regeneration in an  
348 evolutionarily primitive brain--the planarian *Dugesia japonica* model. Eur J  
349 Neurosci 2011;34:863-9.
- 350 2. Watanabe H, Hoang VT, Mattner R, Holstein TW. Immortality and the base of  
351 multicellular life: Lessons from cnidarian stem cells. Semin Cell Dev Biol  
352 2009;20:1114-25.
- 353 3. Gawriluk TR, Simkin J, Thompson KL, Biswas SK, Clare-Salzler Z, Kimani JM,  
354 Kiama SG, Smith JJ, Ezenwa VO, Seifert AW. Comparative analysis of ear-hole  
355 closure identifies epimorphic regeneration as a discrete trait in mammals. Nat  
356 Commun 2016;7:11164.
- 357 4. Morgan TH. Regeneration and liability to injury. Science 1901;14:235-48.
- 358 5. Agata K, Saito Y, Nakajima E. Unifying principles of regeneration I: epimorphosis  
359 versus morphallaxis. Dev Growth Differ 2007;49:73-8.
- 360 6. Maden M, Holder N. Axial characteristics of nerve induced supernumerary limbs in  
361 the axolotl. Wilhelm Roux Arch Dev Biol 1984;193:394-401.
- 362 7. Reddien PW, Alvarado AS. Fundamentals of planarian regeneration. Annu Rev Cell  
363 Dev Biol 2004;20:725-57.
- 364 8. Passamaneck YJ, Martindale MQ. Cell proliferation is necessary for the  
365 regeneration of oral structures in the anthozoan cnidarian *Nematostella vectensis*.

- 366 BMC Dev Biol 2012;12:34.
- 367 9. Zattara EE, Bely AE. Evolution of a novel developmental trajectory: fission is  
368 distinct from regeneration in the annelid *Pristina leidyi*. *Evol Dev* 2011;13:80-95.
- 369 10. Bely AE. Decoupling of fission and regenerative capabilities in an asexual  
370 oligochaete. *Hydrobiologia* 1999;406:243-51.
- 371 11. Zattara EE, Bely AE. Investment choices in post-embryonic development:  
372 quantifying interactions among growth, regeneration, and asexual reproduction in  
373 the annelid *Pristina leidyi*. *J Exp Zool B Mol Dev Evol* 2013;320:471-88.
- 374 12. Zattara EE, Bely AE. Phylogenetic distribution of regeneration and asexual  
375 reproduction in Annelida: regeneration is ancestral and fission evolves in  
376 regenerative clades. *Invertebr Biol* 2016;135:400-14.
- 377 13. Bely AE. Early events in annelid regeneration: a cellular perspective. *Integr Comp*  
378 *Biol* 2014;54:688-99.
- 379 14. Özpolat BD, Bely AE. Developmental and molecular biology of annelid  
380 regeneration: a comparative review of recent studies. *Curr Opin Genet Dev*  
381 2016;40:144-53.
- 382 15. de Jong DM, Seaver EC. Investigation into the cellular origins of posterior  
383 regeneration in the annelid *Capitella teleta*. *Regeneration (Oxf)* 2018;5:61-77.
- 384 16. Bely AE, Wray GA. Evolution of regeneration and fission in annelids: insights

- 385 from *engrailed*- and *orthodenticle*-class gene expression. *Development*  
386 2001;128:2781-91.
- 387 17. Glasby CJ, Timm T. Global diversity of polychaetes (Polychaeta; Annelida) in  
388 freshwater. *Hydrobiologia* 2008;595:107-15.
- 389 18. Falconi R, Gugnali A, Zaccanti F. Quantitative observations on asexual  
390 reproduction of *Aeolosoma viride* (Annelida, Aphanoneura). *Invertebr Biol*  
391 2015;134:151-61.
- 392 19. Herlant-Meewis H. Contribution a l'étude de la régénération chez les oligochètes  
393 *Aeolosomatidae*. *Ann Soc r Zool Belg* 1953;84:117-61.
- 394 20. Bradshaw B, Thompson K, Frank U. Distinct mechanisms underlie oral vs aboral  
395 regeneration in the cnidarian *Hydractinia echinata*. *Elife* 2015;4:e05506.
- 396 21. de Lucas B, Pérez LM, Gálvez BG. Importance and regulation of adult stem cell  
397 migration. *J Cell Mol Med* 2017;22:746-54.
- 398 22. Myohara M, Yoshida-Noro C, Kobari F, Tochinai S. Fragmenting oligochaete  
399 *Enchytraeus japonensis*: a new material for regeneration study. *Dev Growth*  
400 *Differ* 1999;41:549-55.
- 401 23. Xiao N, Ge F, Edwards CA. The regeneration capacity of an earthworm, *Eisenia*  
402 *fetida*, in relation to the site of amputation along the body. *Acta Ecologica Sinica*  
403 2011;31:197-204.

- 404 24. Balavoine G. Segment formation in annelids: patterns, processes and evolution.  
405 Int J Dev Biol 2014;58:469-83.
- 406 25. Bely AE. Distribution of segment regeneration ability in the Annelida. Integr  
407 Comp Biol 2006;46:508-18.
- 408 26. Nechiporuk A, Keating MT. A proliferation gradient between proximal and  
409 *msxb*-expressing distal blastema directs zebrafish fin regeneration. Development  
410 2002;129:2607-17.
- 411 27. Schnapp E, Kragl M, Rubin L, Tanaka EM. Hedgehog signaling controls  
412 dorsoventral patterning, blastema cell proliferation and cartilage induction during  
413 axolotl tail regeneration. Development 2005;132:3243-53.
- 414 28. de Jong DM, Seaver EC. A stable thoracic *Hox* code and epimorphosis  
415 characterize posterior regeneration in *Capitella teleta*. PLoS One  
416 2016;11:e0149724.
- 417 29. Licciano M, Murray JM, Watson GJ, Giangrande A. Morphological comparison of  
418 the regeneration process in *Sabella spallanzanii* and *Branchiomma luctuosum*  
419 (Annelida, Sabellida). Invertebr Biol 2012;131:40-51.
- 420 30. Cai SA, Fu X, Sheng Z. Dedifferentiation: a new approach in stem cell research.  
421 BioScience 2007;57:655-62.
- 422 31. Kalidas RM, Raja SE, Mydeen SAKNM, Samuel SCJR, Durairaj SCJ, Nino GD,

- 423 Palanichelvam K, Vaithi A, Sudhakar S. Conserved lamin A protein expression in  
424 differentiated cells in the earthworm *Eudrilus eugeniae*. Cell Biol Int  
425 2015;39:1036-43.
- 426 32. Kozin VV, Kostyuchenko RP. *Vasa*, *PLI0*, and *Piwi* gene expression during caudal  
427 regeneration of the polychaete annelid *Alitta virens*. Dev Genes Evol  
428 2015;225:129-38.
- 429 33. Martinez VG, Reddy PK, Zoran MJ. Asexual reproduction and segmental  
430 regeneration, but not morphallaxis, are inhibited by boric acid in *Lumbriculus*  
431 *variegatus* (Annelida: Clitellata: Lumbriculidae). Hydrobiologia 2006;564:73-86.
- 432 34. Özpolat BD, Bely AE. Gonad establishment during asexual reproduction in the  
433 annelid *Pristina leidyi*. Dev Biol 2015;405:123-36.
- 434 35. Tweeten KA, Anderson A. Analysis of cell proliferation and migration during  
435 regeneration in *Lumbriculus variegatus* (Clitellata: Lumbriculidae). BIOS  
436 2008;79:183-90.
- 437 36. Aboobaker AA. Planarian stem cells: a simple paradigm for regeneration. Trends  
438 Cell Biol 2011;21:304-11.
- 439 37. Gentile L, Cebria F, Bartscherer K. The planarian flatworm: an *in vivo* model for  
440 stem cell biology and nervous system regeneration. Dis Model Mech  
441 2011;4:12-9.

- 442 38. Umesono Y, Agata K. Evolution and regeneration of the planarian central nervous  
443 system. *Dev Growth Differ* 2009;51:185-95.
- 444 39. Galliot B. Hydra, a fruitful model system for 270 years. *Int J Dev Biol*  
445 2012;56:411-23.
- 446 40. Park HD, Ortmeyer AB, Blankenbaker DP. Cell division during regeneration in  
447 *Hydra*. *Nature* 1970;227:617-9.
- 448 41. Dübel S, Schaller HC. Terminal differentiation of ectodermal epithelial stem cells  
449 of *Hydra* can occur in G2 without requiring mitosis or S phase. *The Journal of*  
450 *Cell Biology* 1990;110:939-45.
- 451 42. Chiu H, Alqadah A, Chuang CF, Chang C. *C. elegans* as a genetic model to  
452 identify novel cellular and molecular mechanisms underlying nervous system  
453 regeneration. *Cell Adh Migr* 2011;5:387-94.
- 454 43. Endo T, Bryant SV, Gardiner DM. A stepwise model system for limb regeneration.  
455 *Dev Biol* 2004;270:135-45.
- 456 44. Worley MI, Setiawan L, Hariharan IK. Regeneration and transdetermination in  
457 *Drosophila* imaginal discs. *Annu Rev Genet* 2012;46:289-310.
- 458 45. Dubois P, Ameye L. Regeneration of spines and pedicellariae in echinoderms: a  
459 review. *Microsc Res Tech* 2001;55:427-37.
- 460 46. Yu N, Christiaens O, Liu J, Niu J, Cappelle K, Caccia S, Huvenne H, Smagghe G.



- 461 Delivery of dsRNA for RNAi in insects: an overview and future directions. *Insect*  
462 *Sci* 2013;20:4-14.
- 463 47. Canistro D, Boccia C, Falconi R, Bonamassa B, Valgimigli L, Vivarelli F, Soleti A,  
464 Genova ML, Lenaz G, Sapone A, et al. Redox-based flagging of the global  
465 network of oxidative stress greatly promotes longevity. *J Gerontol A Biol Sci*  
466 *Med Sci* 2015;70:936-43.
- 467 48. Falconi R, Renzulli T, Zaccanti F. Survival and reproduction in *Aeolosoma viride*  
468 (Annelida, Aphanoneura). *Hydrobiologia* 2006;564:95-9.
- 469 49. Nandini S, Sarma SSS. Effect of *Aeolosoma* sp. (Aphanoneura: Aeolosomatidae)  
470 on the population dynamics of selected cladoceran species. *Hydrobiologia*  
471 2004;526:157-63.
- 472 50. Kamath RS, Martinez-Campos M, Zipperlen P, Fraser AG, Ahringer J.  
473 Effectiveness of specific RNA-mediated interference through ingested  
474 double-stranded RNA in *Caenorhabditis elegans*. *Genome Biol*  
475 2001;2:research0002.1-research.10.
- 476 51. Newmark PA, Reddien PW, Cebrià F, Alvarado AS. Ingestion of bacterially  
477 expressed double-stranded RNA inhibits gene expression in planarians. *Proc Natl*  
478 *Acad Sci U S A* 2003;100:11861-5.
- 479

480 **Acknowledgments**

481 We thank Dr. Kuo Dian-Han and Dr. Lai Yi-Te, who contributed greatly by proving  
482 continual guidance, editing and reviewing this manuscript.

483

484 **Funding**

485 This study was supported in part by a grant from the Ministry of Science and  
486 Technology (MOST, Taiwan, grant no. 103-2311-B-002-017-MY3)

487

488 **Availability of data and materials**

489 The datasets generated and/or analysed during the current study are available from the  
490 corresponding author on reasonable request.

491

492 **Author contributions**

493 All authors designed the experiments. CC, SF and YH carried out the experiments.  
494 CC and SF interpreted the data. CC and SF wrote the manuscript. JC reviewed this  
495 manuscript.

496

497 **Competing interests**

498 The authors declare no competing interests.

499

500 **Figure legends**

501 **Figure 1. The morphology and paratonic fission of intact *A. viride*.** (A) The first  
502 segment of intact *A. viride* has a prostomium and a peristomium with a mouth.  
503 Average *A. viride* contains 10 to 12 segments with pairs of chaetae. The transparent  
504 body has an enlarged digestive tract located at the center of its body. The pygidium is  
505 located on the last segment of the posterior end. The red dashed line indicated the  
506 amputation site in front of enlarged digestive tract. (B) After the worm was amputated  
507 at the site indicated in (A), the two fragments will individually proceed anterior or  
508 posterior regeneration (indicated by white arrows). (C-E) The process of paratonic  
509 fission separated an intact worm into two individuals. Worms with unusual lengthy  
510 posterior region could be easily observed (Fig. 1C). The anterior portion of the  
511 offspring gradually developed, and tilted apart from the parental worm (Fig. 1D). The  
512 offspring worm break apart from the parental worm, and become an individual worm  
513 (Fig. 1E). The white arrow indicated interface between parent and offspring worm.  
514 Scale bar: 1 mm.

515

516 **Figure 2. Anterior regeneration in *A. viride*.** The worms were amputated in front of  
517 the enlarged digestive tract, and the external morphology was observed in intact (A)

518 and 0 to 120 hpa (B) during regeneration. The intact worm has a mouth that can be  
519 observed at both dorsal and ventral side of the peristomium at the first segment.  
520 During anterior regeneration, the rough wounded area became smooth during wound  
521 closure within 3 to 6 hpa. The protruding regenerative blastema became apparent from  
522 24 to 48 hpa in most regenerating *A. viride*. Mouth formation, could be observed  
523 around 96 hpa. After 96 hours of regeneration, the cephalic shape started to bulging.  
524 Then, the prostomium expanded from 96 to 120 hpa. The amputation site was labeled  
525 by black dotted line and the black arrow indicated the re-opening of mouth. Scale bar:  
526 50  $\mu\text{m}$ .

527

528 **Figure 3. Minimum segments required for successful regeneration in *A. viride*.**

529 Worms were amputated into different number of segments. The successful ratio of  
530 either anterior or posterior regeneration in amputated worms regenerating from  
531 different segments were observed at 5 or 3 dpa. The minimum segments required for  
532 successful regeneration in *A. viride* was 3. All data represented the mean  $\pm$  s.d. from  
533 at least three independent duplicate experiments (n = 10). One-way ANOVA was  
534 performed to determine the significance of success rates compared to each group. \*:  $p$   
535  $<0.05$ ; \*\*:  $p < 0.01$ .

536

537 **Figure 4. Cell proliferation was detected by EdU labeling during anterior**  
538 **regeneration in *A. viride*.** Worms were incubated in 100  $\mu\text{g ml}^{-1}$ EdU for 12 hours  
539 prior to collecting the specimen at different time points after amputation. (A) EdU  
540 signal (green) reveals cell proliferation conformed by nuclei stained with Hoechst  
541 33342 (blue). The white dotted line indicates the colocalization cells in three channels.  
542 Scale bar: 10  $\mu\text{m}$ . (B) The worms were labeled with Hoechst 33342 and EdU in intact  
543 worm. Figure on the right were magnified pictures of the head or tail regions. The  
544 yellow arrow indicates the asexual reproductive zone. Since the asexual reproductive  
545 zone undergo continued cell proliferation to produce progeny, the area showed  
546 stronger signal of Hoechst 33342 which indicates the presence of larger amount of  
547 cells. H: head, T: tail. (C) Cell proliferation was detected on anterior regenerating site  
548 at different time points. Prior to amputation, the head, mouth showed the strongest  
549 EdU signal. Minor proliferating cells randomly distributed throughout the body. After  
550 12 hpa, EdU signal became focused at the wounded site. Edu signal completely  
551 diminished post the amputation site after 24 hpa. The EdU signal peaked at 24 and 48  
552 hpa, then gradually diminished. The amputation site is labeled by yellow dotted line.  
553 Red triangle indicated the reappeared mouth. Scale bar: 100  $\mu\text{m}$ .

554

555 **Figure 5. The inhibitory effect of taxol on cell proliferation and anterior**

556 **regeneration in *A. viride*.** (A) *A. viride* was incubated in EdU 12 hours prior to  
557 fixation at 48 hpa. The amount of proliferating cells at the blastema was decreased  
558 after 25  $\mu$ M taxol treatment. (B, C) The regeneration successful ratio was examined  
559 from 1 to 7 dpa. Taxol treated worms showed delay and significant decrease compare  
560 to the control group at 7 dpa. (D) The head morphology of regenerating worms was  
561 obviously affected by taxol treatment. Head formation could be clearly observed in  
562 regenerating worm incubated in 0.5% ethanol at 5 dpa, however, only a piece of  
563 protruding tissue could be observed in the taxol treated group. At 7 dpa, the ethanol  
564 treated group demonstrated normal regeneration, but the taxol treated group barely  
565 started the formation of a regenerative blastema. Scale bar: 100  $\mu$ m. All data  
566 represented the mean  $\pm$  s.d. from at least three independent duplicate experiments.  
567 Significant differences relative to control group (0.5% ethanol) were denoted by \*. \*:  $p$   
568  $<0.05$ ; \*\*:  $p < 0.01$ ; \*\*\*:  $p < 0.001$  using two-tailed unpaired student's t-test.

569

570 **Figure 6. The inhibitory effect of *Avi-tubulin* microRNA on anterior regeneration.**

571 Either the expression level of *Avi-tubulin* mRNA (A) or protein (B) expression levels o  
572 were detected to assay the knock-down efficiency. The inhibitory effect of  
573 regeneration successful ratio by *Avi-tubulin* RNAi was observed at 120 hpa (C).  
574 One-way ANOVA was performed to determine the significance of mRNA, protein

575 expression or successful ratio compared to control group. \*\*:  $p < 0.01$ .

576

577 **Figure 7. Limited cell migration is observed at anterior regenerating site of *A.***

578 *viride*. The proliferating cells were incorporated by EdU for 24 hours prior to

579 amputation in intact and regenerating worms. At 24, 72, 120 hours post amputation,

580 minor EdU<sup>+</sup> cell migrated to regenerating area. Although limited signals could be

581 detected at the surface of regenerating worms, the number of proliferating cells

582 significantly differed from the area behind amputation site. The white dotted line

583 indicates the reappearance of enlarged head. The yellow bracket indicated the

584 enlarged area for the figure on the right side. Scale bar: 100  $\mu\text{m}$ .

Figure 1

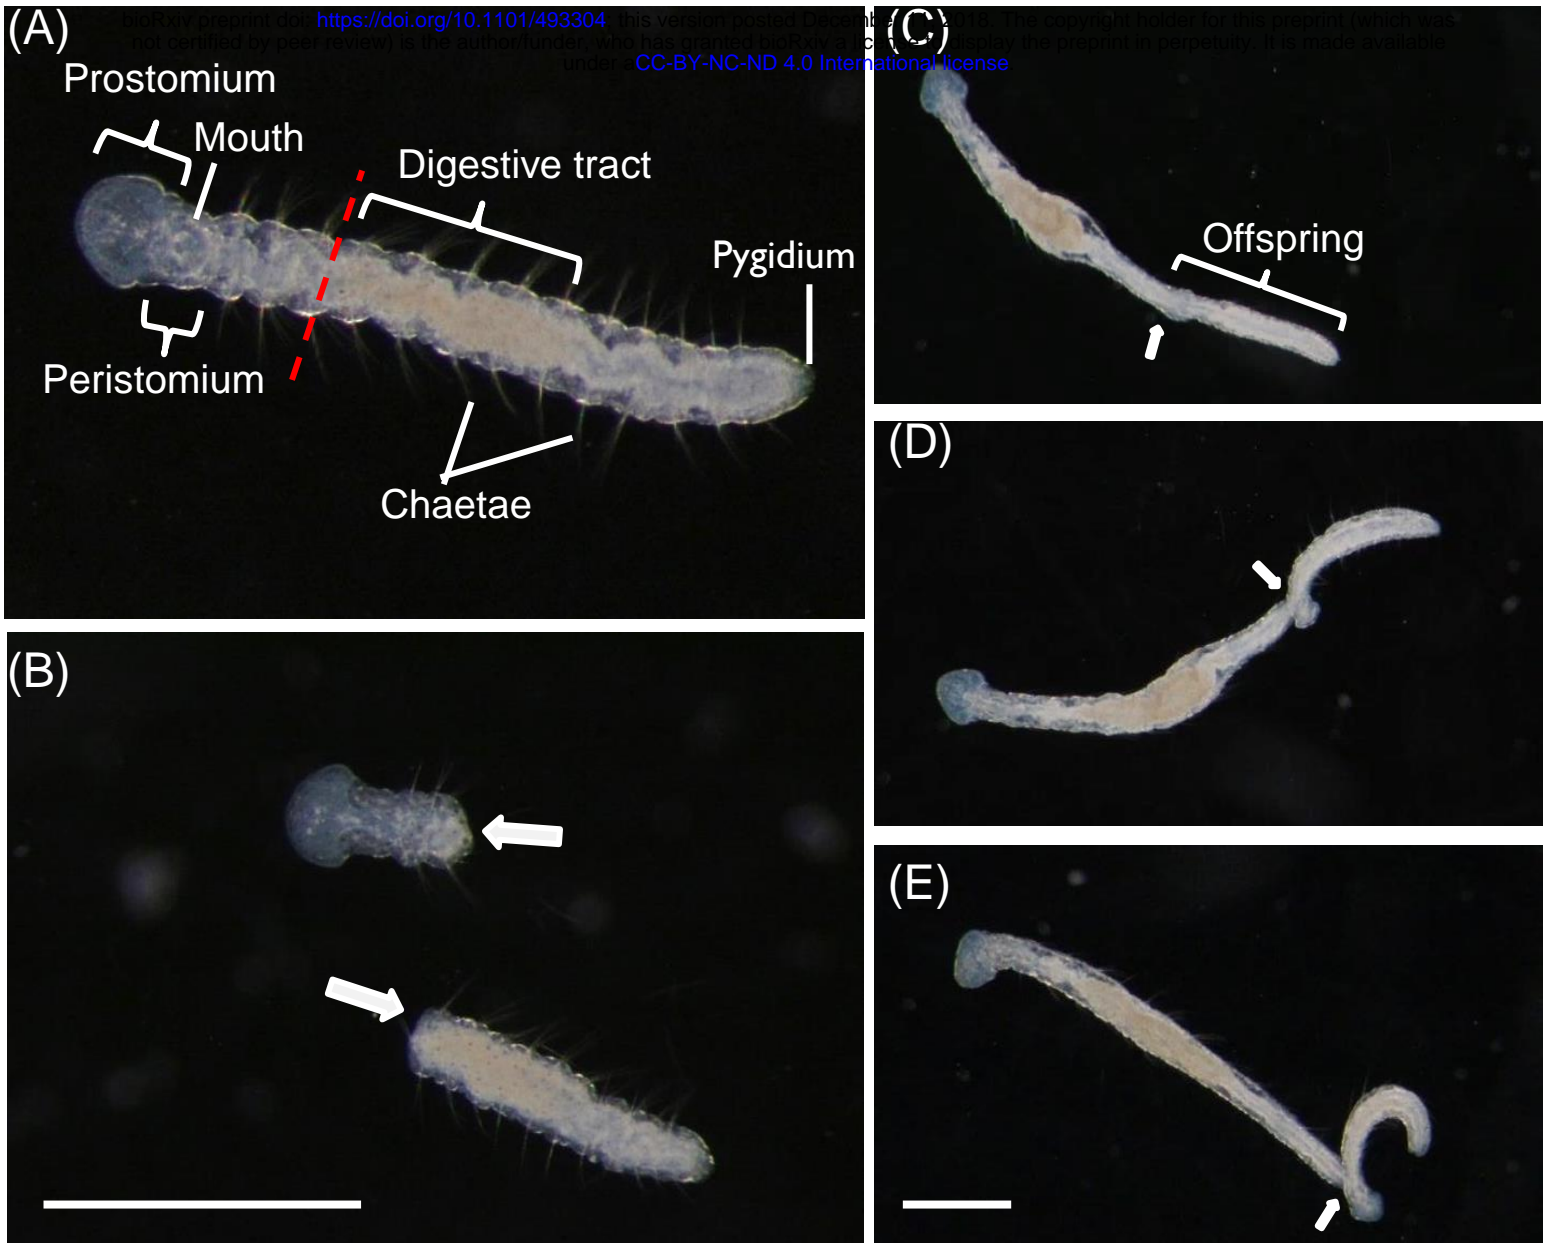



# Figure 2

(A) bioRxiv preprint doi: <https://doi.org/10.1101/493304>; this version posted December 11, 2018. The copyright holder for this preprint (which was not certified by peer review) is the author/funder, who has granted bioRxiv a license to display the preprint in perpetuity. It is made available under aCC-BY-NC-ND 4.0 International license.

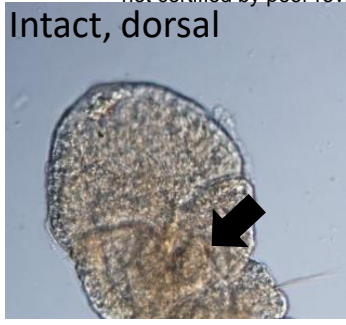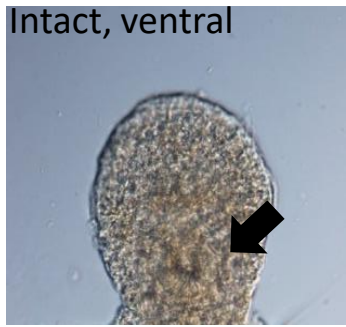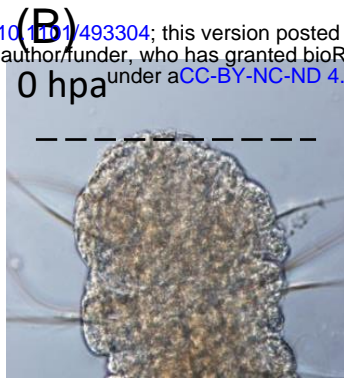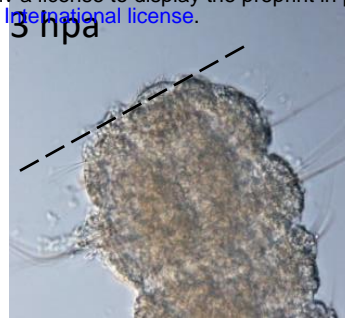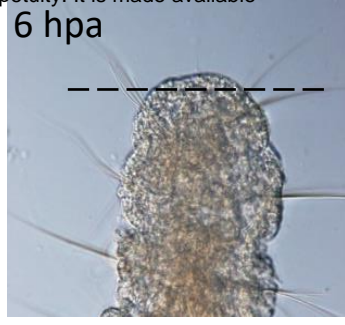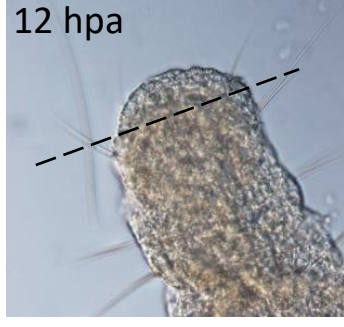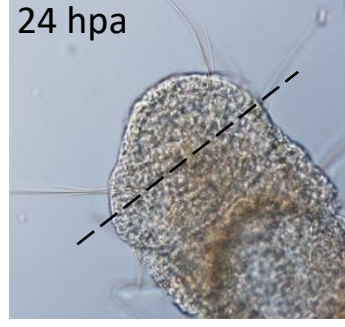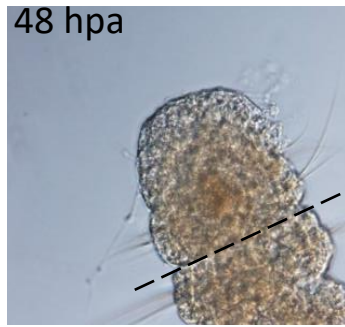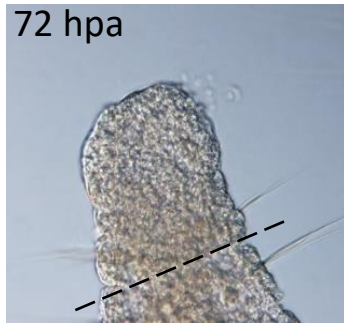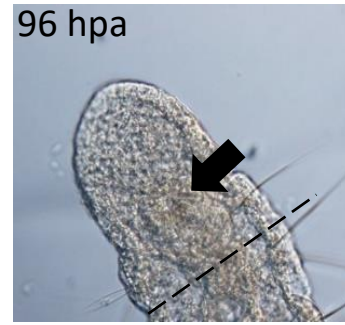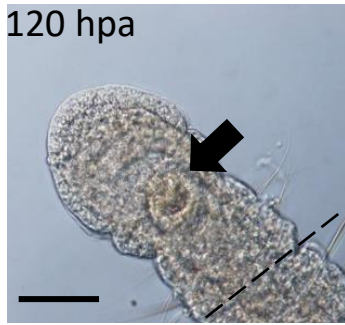

# Figure 3

bioRxiv preprint doi: <https://doi.org/10.1101/493304>; this version posted December 11, 2018. The copyright holder for this preprint (which was not certified by peer review) is the author/funder, who has granted bioRxiv a license to display the preprint in perpetuity. It is made available under aCC-BY-NC-ND 4.0 International license.

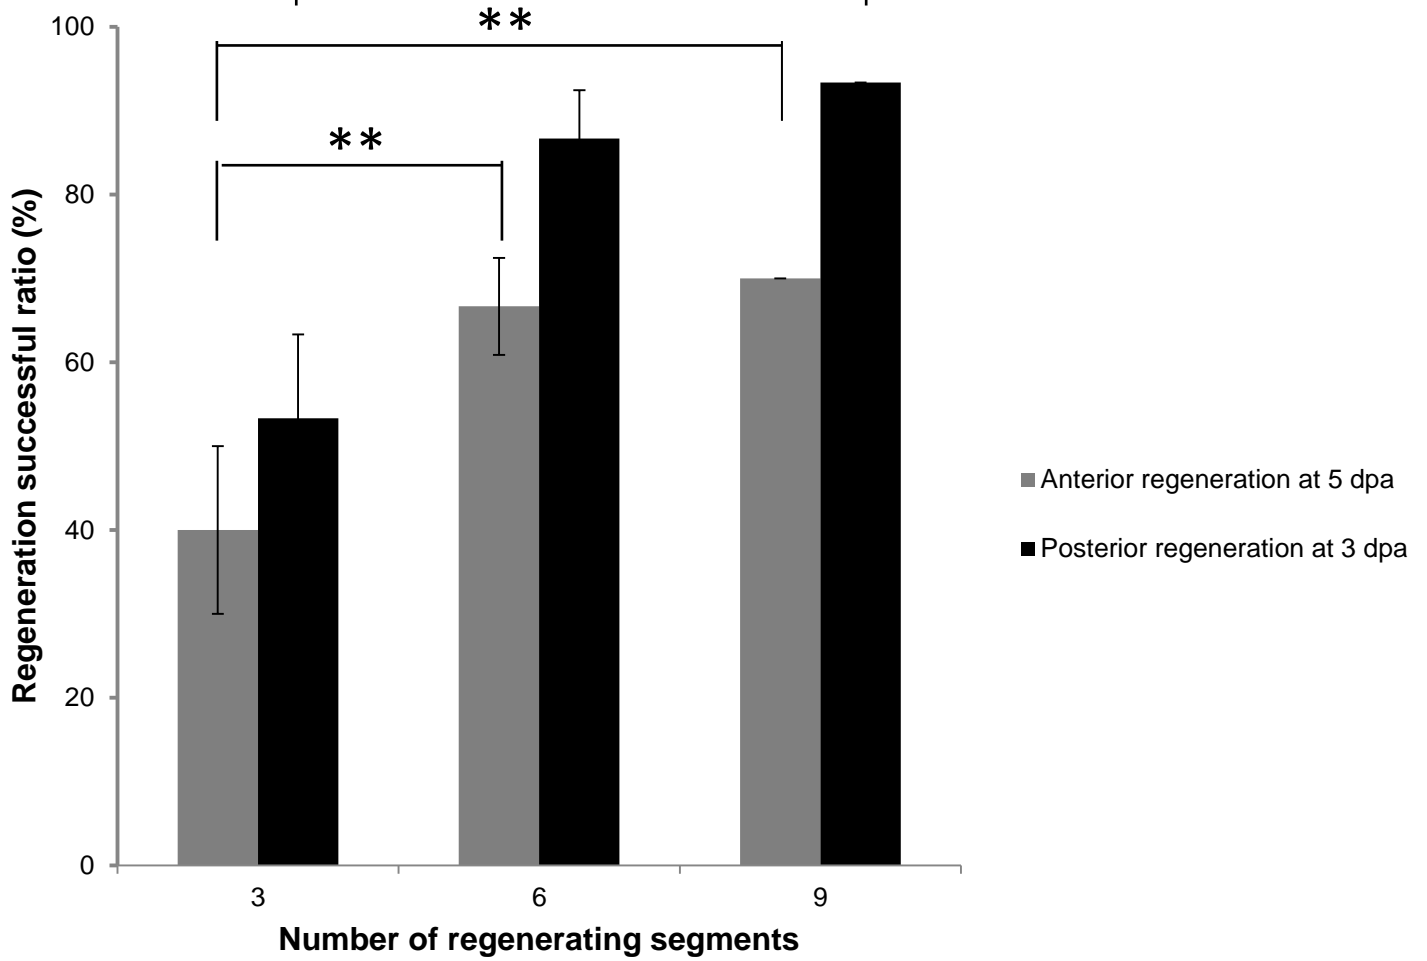

# Figure 4

(A)

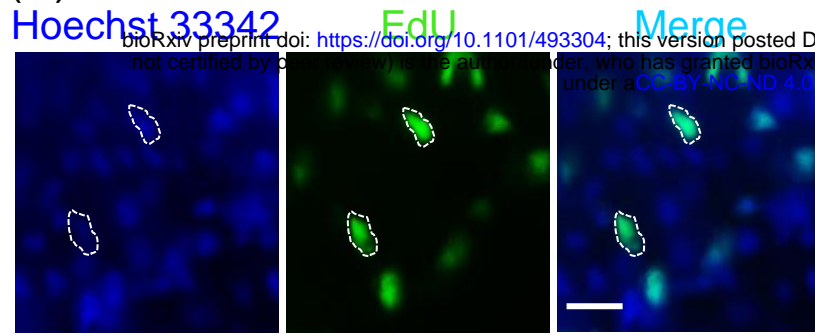

(B)

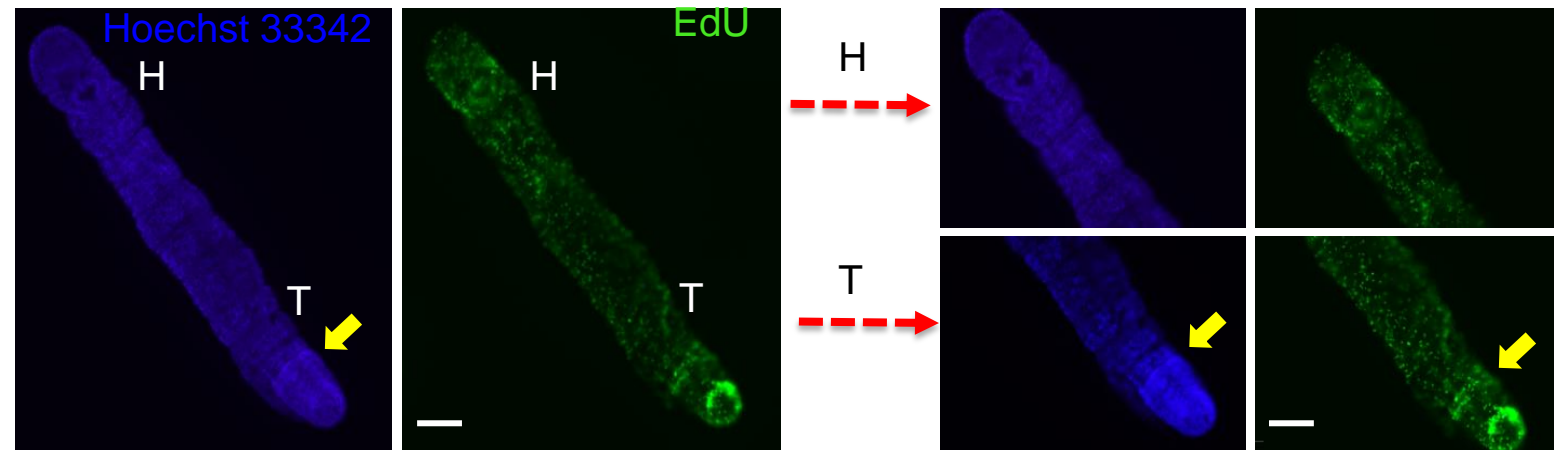

(C)

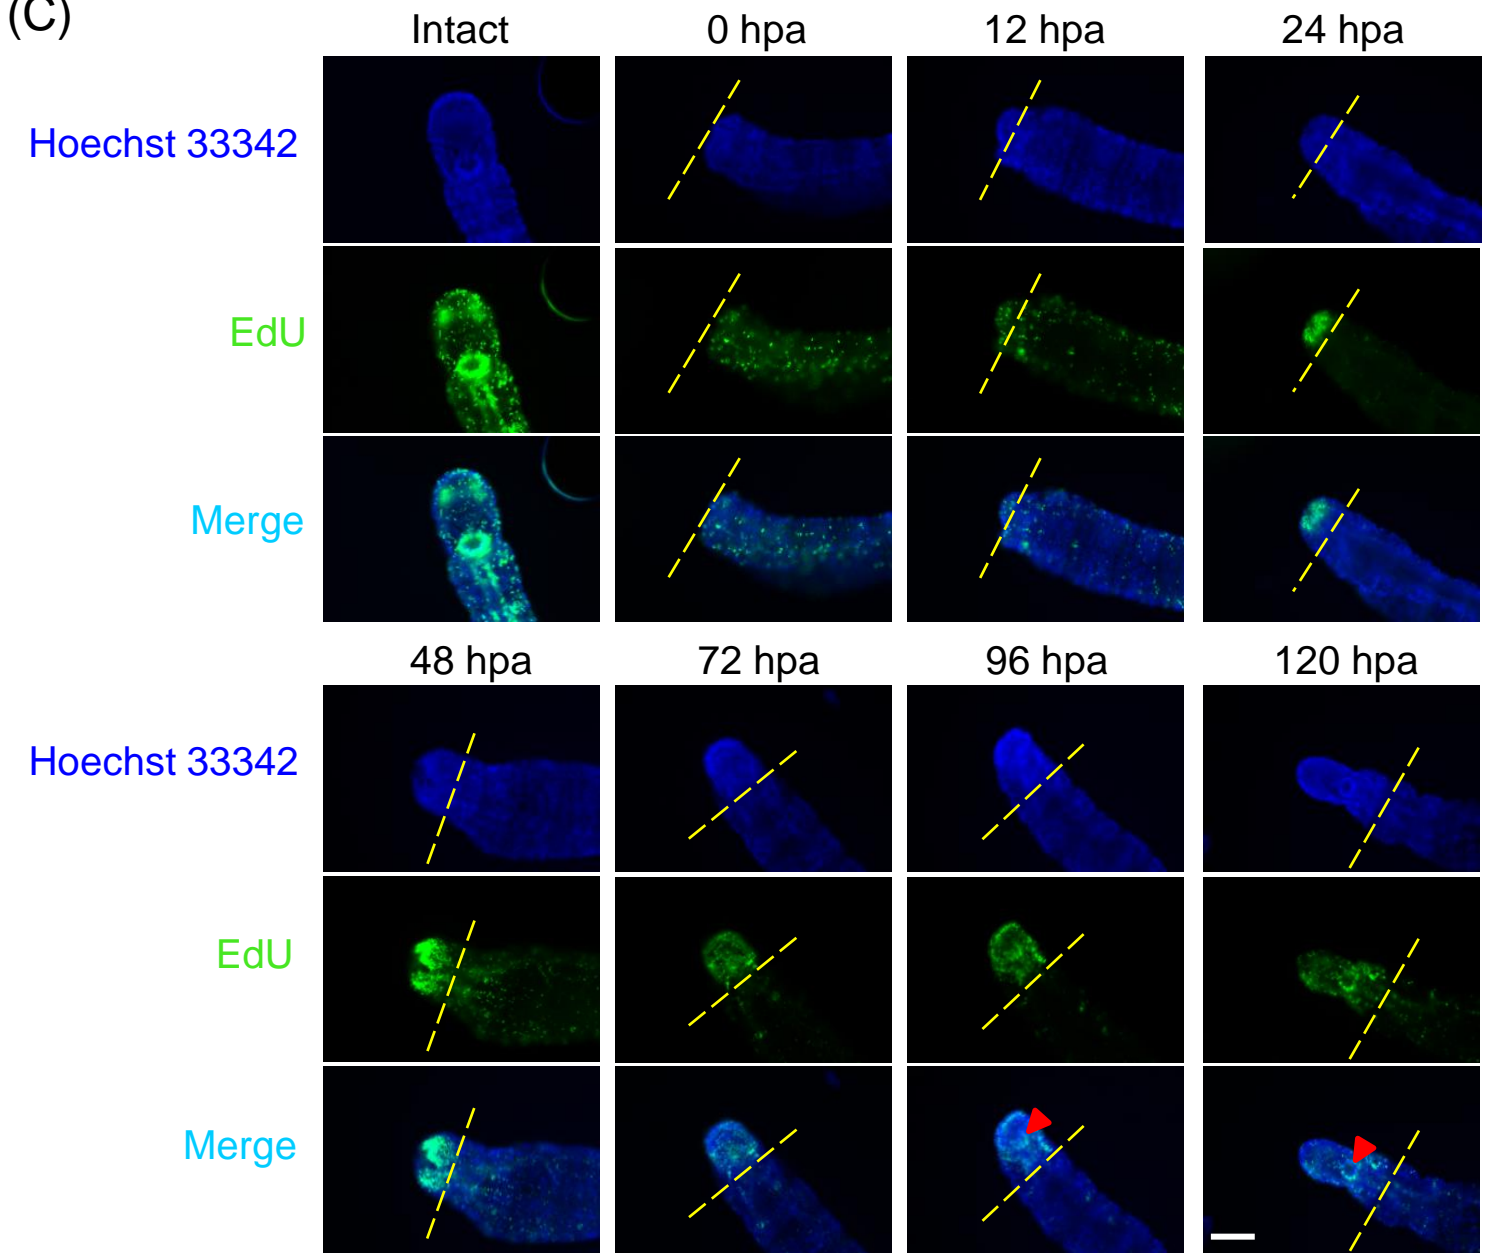

# Figure 5

(A)

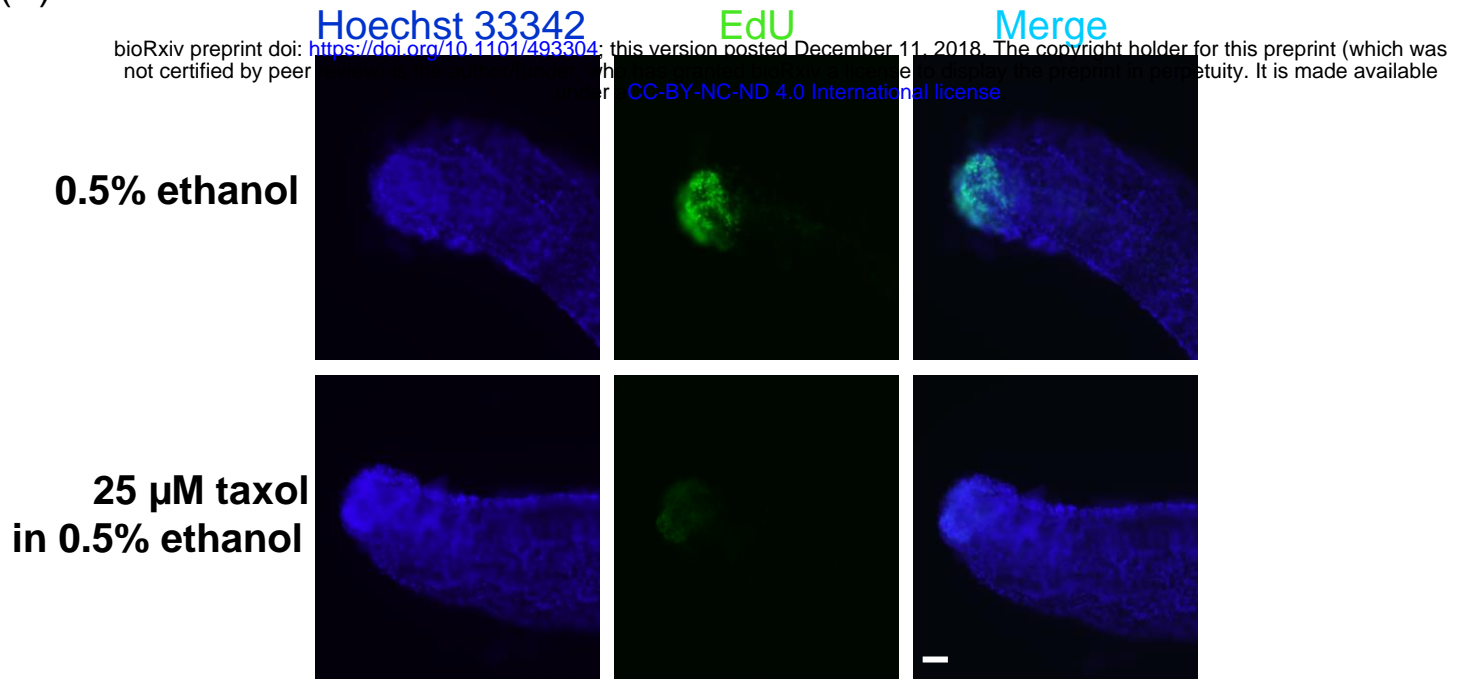

(B)

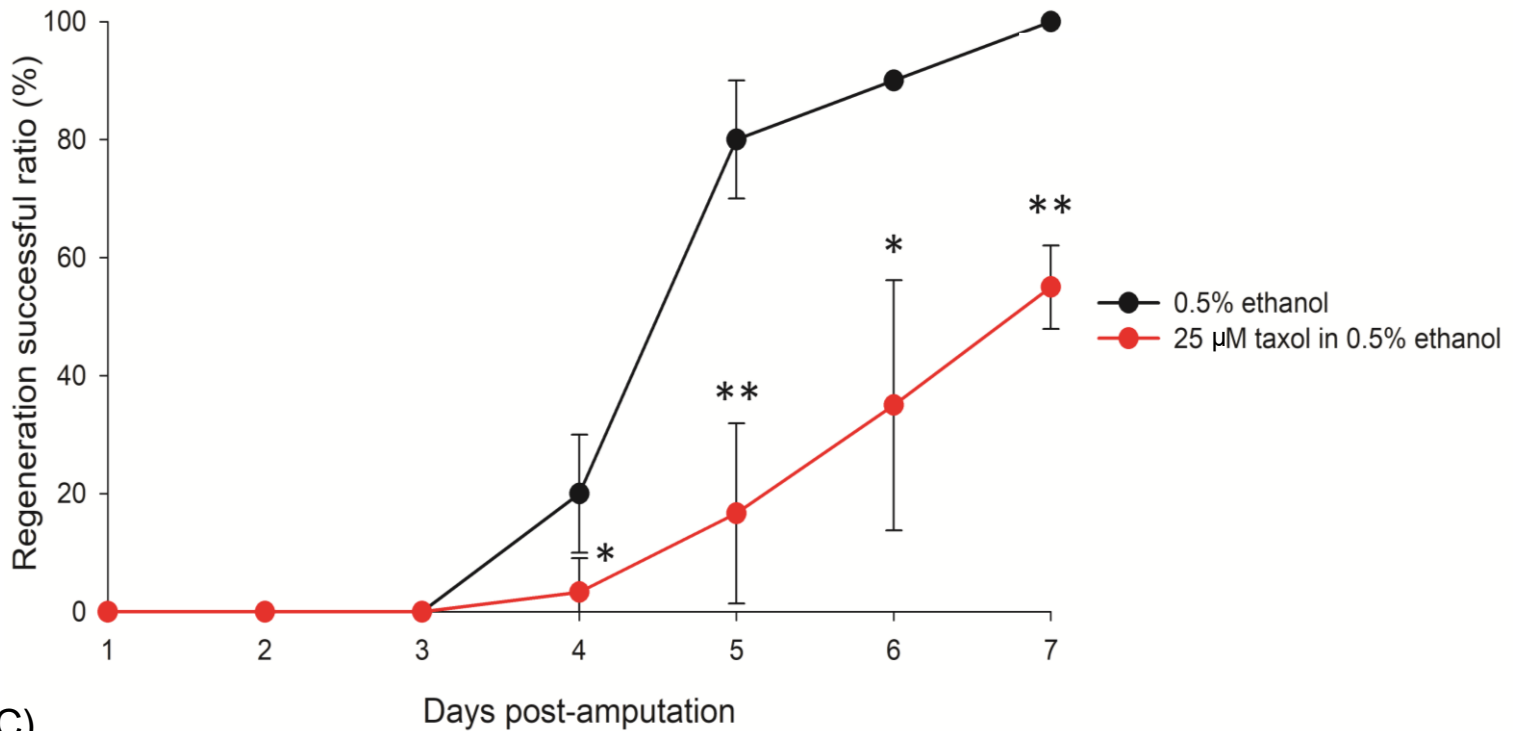

(C)

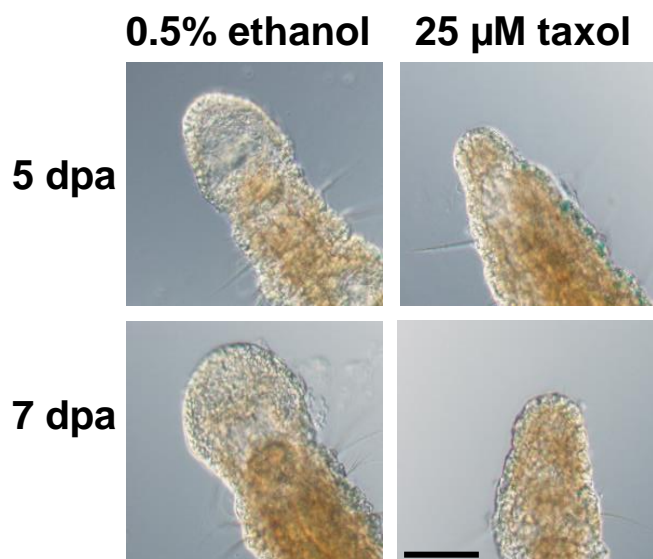

# Figure 6

bioRxiv preprint doi: <https://doi.org/10.1101/493304>; this version posted December 11, 2018. The copyright holder for this preprint (which was not certified by peer review) is the author/funder, who has granted bioRxiv a license to display the preprint in perpetuity. It is made available under aCC-BY-NC-ND 4.0 International license.

(A)

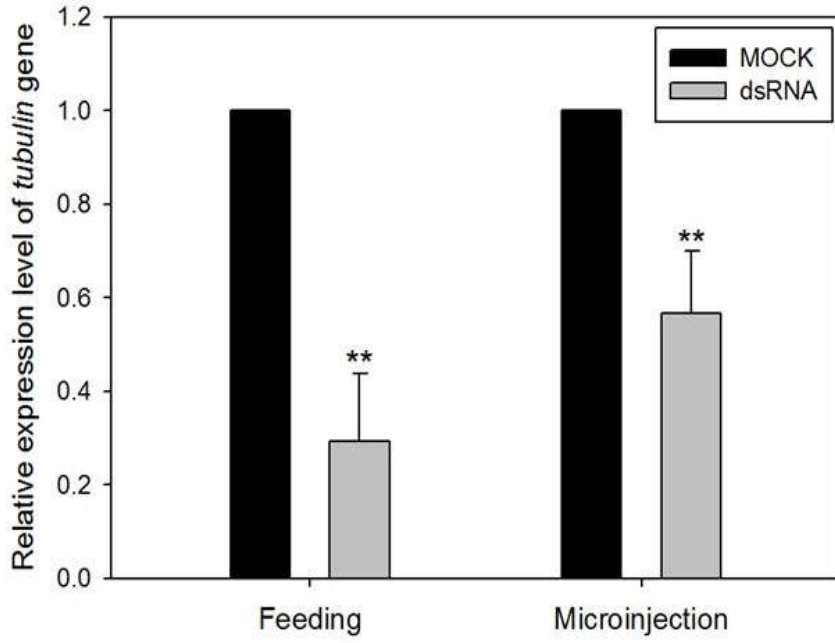

(B)

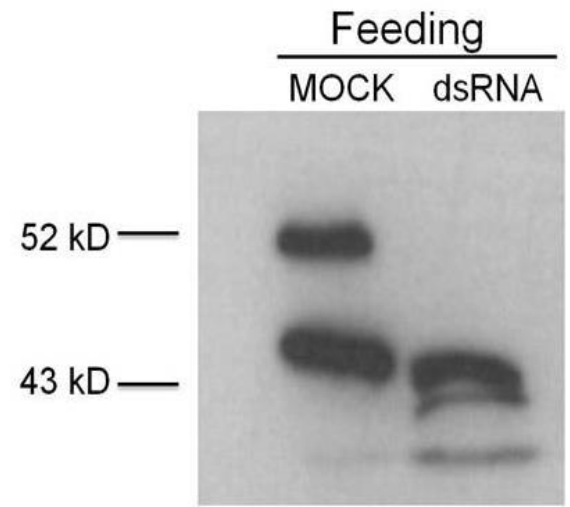

(C)

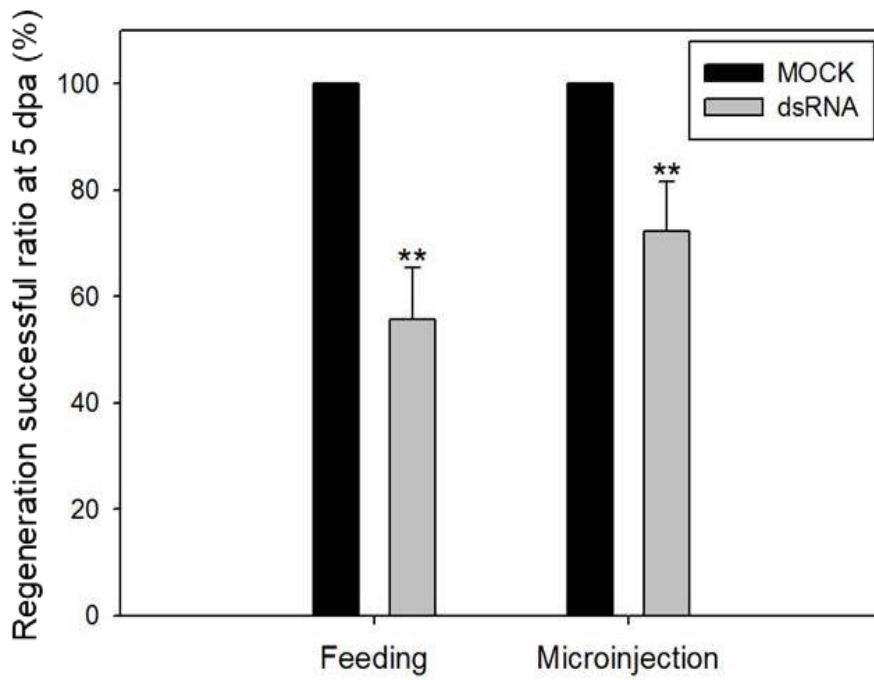

# Figure 7

bioRxiv preprint doi: <https://doi.org/10.1101/493364>; this version posted December 12, 2018. The copyright holder for this preprint (which was not certified by peer review) is the author/funder, who has granted bioRxiv a license to display the preprint in perpetuity. It is made available under aCC-BY-NC-ND 4.0 International license.

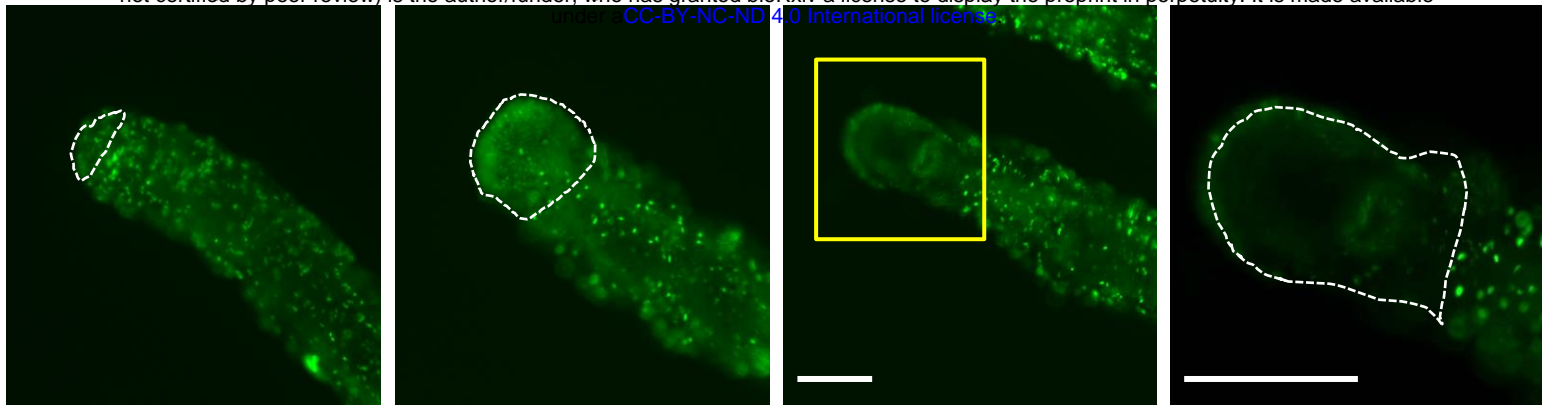

Source: https://www.biorxiv.org/content/10.1101/493304.full.pdf
